# Supplementary material
Source: HighWire-hosted journal article supplement (https://cmajopen.ca/highwire/filestream/87527/field_highwire_adjunct_files/0/open-2020-0184-1-at.pdf)
Supplement: open-2020-0184-1-at.pdf [file open-2020-0184-1-at.pdf]

## Supplementary Figure 1 – Paramedic Services of the Southwest Region Base Hospital Program

### Paramedic Services included in the study:

Middlesex-London Paramedic Service

Essex-Windsor EMS

The County of Lambton EMS

Medavie EMS Chatham-Kent

Perth County Paramedic Services

Grey County Paramedic Services

Medavie EMS Elgin Ontario

Bruce County Paramedic Services

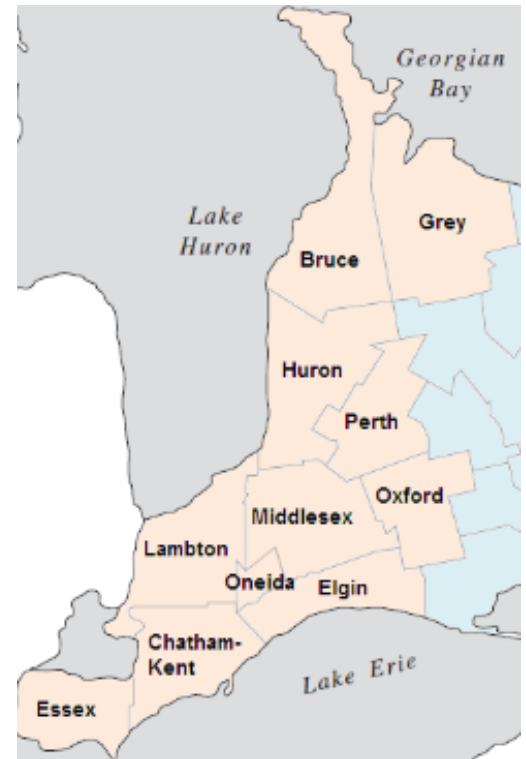

### Paramedic Services not included:

Huron County Paramedic Services

Oneida Nation Paramedic Services

Oxford County Paramedic Services

EMS, emergency medical services

Supplementary Table 1 – Final Primary Problem Code of Calls (N=9185)

|                                      |              |
|--------------------------------------|--------------|
|                                      |              |
| Diabetic Emergency                   | 67.5% (6196) |
| Other Medical/Trauma                 | 5.1% (469)   |
| Invalid Code                         | 5.0% (461)   |
| Weakness/Dizziness/Unwell            | 4.1% (374)   |
| Interfacility Transfer               | 3.5% (324)   |
| Altered Level of Consciousness       | 2.6% (235)   |
| Missing Code                         | 1.9% (175)   |
| Active Seizure                       | 1.3% (119)   |
| Confusion/Disorientation             | 0.9% (80)    |
| Drug/Alcohol Overdose                | 0.8% (78)    |
| Unconscious                          | 0.7% (62)    |
| Dyspnea                              | 0.7% (61)    |
| Musculoskeletal                      | 0.7% (60)    |
| Stroke/Transient Ischemic Attack     | 0.6% (56)    |
| Vital Signs Absent - Cardiac/Medical | 0.6% (53)    |
| Hypotension                          | 0.6% (51)    |
| Ischemic                             | 0.5% (49)    |
| Behaviour/Psychiatric                | 0.5% (44)    |
| Nausea/Vomiting/Diarrhea             | 0.4% (40)    |
| Gynecologic Emergency                | 0.4% (36)    |

|                                                     |           |
|-----------------------------------------------------|-----------|
| Non-Traumatic Abdominal/Pelvic/Perineal/Rectal Pain | 0.4% (34) |
| Headache                                            | 0.2% (22) |
| Temporary Loss of Consciousness                     | 0.2% (19) |
| Treatment/Diagnosis & Return                        | 0.2% (14) |
| Poisoning/Toxic Exposure                            | 0.1% (12) |
| Palpitations                                        | 0.1% (10) |
| Back Pain                                           | 0.1% (9)  |
| Environmental Emergency                             | 0.1% (9)  |
| Allergic Reaction                                   | <0.1% (5) |
| Suspected Sepsis                                    | <0.1% (5) |
| Hemorrhage                                          | <0.1% (5) |
| Pulmonary Edema                                     | <0.1% (4) |
| Obstetric Emergency                                 | <0.1% (4) |
| Vital Signs Absent - Traumatic                      | <0.1% (2) |
| Convalescent/Invalid/Return Home                    | <0.1% (2) |
| Post-Arrest                                         | <0.1% (1) |
| Cardiogenic Shock                                   | <0.1% (1) |
| Anaphylaxis                                         | <0.1% (1) |
| Infectious Disease                                  | <0.1% (1) |
| Organ Recipient                                     | <0.1% (1) |
| Newborn/Neonatal                                    | <0.1% (1) |

Data are presented as % (N).

Supplementary Table 2 – Calls with problem code 83 (diabetic emergency) with no paramedic treatment for hypoglycemia

|                                              | N=1692      |                                                                                       |
|----------------------------------------------|-------------|---------------------------------------------------------------------------------------|
| Initial CBG < 4.0 mmol/L                     | 276 (16.3%) | hypoglycemic but not treated by paramedics                                            |
| Initial CBG 4.0-14.9 mmol/L                  | 885 (52.3%) | hyperglycemic OR hypoglycemic and treated by someone else (not treated by paramedics) |
| Initial CBG not documented                   | 524 (31.0%) |                                                                                       |
| Initial CBG not available (error/no reading) | 7 (0.4%)    |                                                                                       |

Data are presented as N (%)
